# Supplementary material for: Antibodies against cell adhesion molecules and neural structures in paraneoplastic neuropathies
Source: PubMed Central journal article supplement — Ann Clin Transl Neurol. 2018 Mar 26;5(5):559–69. doi: 10.1002/acn3.554 (PMC5945957; doi:10.1002/acn3.554), 2018-03-26
Supplement: ACN3-5-559-s001.pdf [file ACN3-5-559-s001.pdf]

| cDNA Clone                                                                                         | Protein of interest  | Permeabilization | Sera dilution | Blocking solution  | Commercial antibody                | Commercial antibody dilution | Secondary antibodies                                                   | Secondary antibodies dilution |
|----------------------------------------------------------------------------------------------------|----------------------|------------------|---------------|--------------------|------------------------------------|------------------------------|------------------------------------------------------------------------|-------------------------------|
| NF140 vector courtesy of Dr. Devaux                                                                | <b>NF140</b>         | No               | 1/100         | Goat 5% in PBS     | Chicken NF (AF3235 R&D systems)    | 1/1000                       | GAC488 (A11039 Molecular Probes)+ GAH594 (Ab98621 Abcam)               | 1/1000 +1/1000                |
| pCMV6-NFASC-Myc-DDK (RC228652 Origene)                                                             | <b>NF155</b>         | No               | 1/100         | Goat 5% in PBS     | Chicken NF (AF3235 R&D systems)    | 1/1000                       | GAC488 (A11039 Molecular Probes) + GAH594 (Ab98621 Abcam)              | 1/1000 +1/1000                |
| NF186 vector courtesy of Dr. Devaux                                                                | <b>NF186</b>         | No               | 1/100         | Goat 5% in PBS     | Chicken NF (AF3235 R&D systems)    | 1/1000                       | GAC488 (A11039 Molecular Probes) + GAH594 (Ab98621 Abcam)              | 1/1000 +1/1000                |
| pCMV6-CNTN1-untagged (EX-A1153-M02 Genecopoeia)                                                    | <b>CNTN1</b>         | No               | 1/100         | Rabbit 1/40 in PBS | Goat CNTN1 (AF904 R&D systems)     | 1/1000                       | RAG488 (A11078 Thermo Scientific)+ RAH594 (SA510112 Thermo Scientific) | 1/1000 +1/1000                |
| pCMV6-CNTN1-untagged (EX-A1153-M02 Genecopoeia)+ pCMV6-CNTNAP1-untagged (EX-M0417-M02 Genecopoeia) | <b>CNTN1+ CASPR1</b> | No               | 1/100         | Rabbit 1/40 in PBS | Goat CNTN1 (AF904 R&D systems)     | 1/1000                       | RAG488 (A11078 Thermo Scientific)+ RAH594 (SA510112 Thermo Scientific) | 1/1000 +1/1000                |
| CASPR2 vector courtesy of Dr. Graus                                                                | <b>CASPR2</b>        | Yes              | 1/40          | Goat 5% in PBS     | Rabbit CASPR-2 (Ab33994 Abcam)     | 1/500                        | GAR 488 (A11008 Thermo Scientific)+ GAH 594 (Ab98621 Abcam)            | 1/1000 +1/1000                |
| pCMV6-L1CAM -Myc-DDK (RC211601 Origene)                                                            | <b>L1CAM</b>         | Yes              | 1/100         | Goat 5% in PBS     | Mouse-anti-Myc (CBL430 Millipore)  | 1/200                        | GAM 488 (A-11001 Molecular Probes) + GAH594 (Ab98621 Abcam)            | 1/500 +1/500                  |
| pCMV6-NCAM1-C-His (EX-X0019-M77 Genecopoeia)                                                       | <b>NCAM1</b>         | No               | 1/100         | Goat 5% in PBS     | Mouse NCAM (347740 BD Biosciences) | 1/1000                       | GAM 488 (A-11001 Molecular Probes) + GAH594 (Ab98621 Abcam)            | 1/500 +1/500                  |

**Supplementary Table 1. HEK293 cell transfection and ICC conditions.**
