# Supplementary material for: Antibodies against cell adhesion molecules and neural structures in paraneoplastic neuropathies
Source: PubMed Central journal article supplement — Ann Clin Transl Neurol. 2018 Mar 26;5(5):559–69. doi: 10.1002/acn3.554 (PMC5945957; doi:10.1002/acn3.554), 2018-03-26
Supplement: ACN3-5-559-s002.pdf [file ACN3-5-559-s002.pdf]

| Patient number | Neuropathy    | Tumor            | Gender | Age |
|----------------|---------------|------------------|--------|-----|
| 1              | Sensory-Motor | GASTRIC          | M      | 46  |
| 2              | Sensory-Motor | BLADDER          | M      | 65  |
| 3              | Sensory-Motor | OVARIAN          | F      | 67  |
| 4              | Sensory-Motor | LYMPHOMA         | M      | 69  |
| 5              | Sensory-Motor | COLON            | M      | 71  |
| 6              | Sensory-Motor | SEMINOMA         | M      | 73  |
| 7              | Sensory-Motor | BREAST           | F      | 52  |
| 8              | Sensory-Motor | NSCLC            | M      | NA  |
| 9              | Sensory       | SCLC             | M      | 69  |
| 10             | Sensory       | SCLC             | M      | 52  |
| 11             | Sensory       | SCLC             | M      | 64  |
| 12             | Sensory       | SCLC             | M      | 43  |
| 13             | Sensory       | SCLC             | M      | 51  |
| 14             | Sensory       | SCLC             | M      | 69  |
| 15             | Sensory       | SCLC             | M      | 62  |
| 16             | Sensory       | GASTRIC          | M      | 70  |
| 17             | Sensory       | NSCLC            | F      | 64  |
| 18             | Sensory       | NSCLC            | M      | 66  |
| 19             | Sensory       | NSCLC            | M      | 72  |
| 20             | Sensory       | MELANOMA         | M      | 84  |
| 21             | Sensory       | TONSIL           | M      | 60  |
| 22             | Sensory       | PELVIC           | F      | 79  |
| 23             | Sensory       | NSCLC            | M      | 65  |
| 24             | Sensory       | PROSTATE         | M      | 69  |
| 25             | Sensory       | NSCLC            | M      | 77  |
| 26             | Sensory       | LYMPHOMA         | M      | 56  |
| 27             | Sensory       | PROSTATE         | M      | 65  |
| 28             | Sensory       | NSCLC            | M      | 60  |
| 29             | Sensory       | LYMPHOMA         | M      | 64  |
| 30             | Sensory       | NSCLC            | F      | 48  |
| 31             | Sensory       | PAROTID GLAND    | M      | 76  |
| 32             | Sensory       | MELANOMA         | F      | 46  |
| 33             | Sensory-Motor | COLON            | F      | 59  |
| 34             | Sensory-Motor | INVASIVE THYMOMA | F      | 44  |

**Supplementary Table 2. Patients' clinical and demographic data.** SCLC: small cell lung cancer, NSCLC: non-small cell lung cancer, NA: not available.
