# Supplementary material for: Antibodies against cell adhesion molecules and neural structures in paraneoplastic neuropathies
Source: PubMed Central journal article supplement — Ann Clin Transl Neurol. 2018 Mar 26;5(5):559–69. doi: 10.1002/acn3.554 (PMC5945957; doi:10.1002/acn3.554), 2018-03-26
Supplement: ACN3-5-559-s003.pdf [file ACN3-5-559-s003.pdf]

| PATIENT NUMBER | LICAM | NCAM1 | CNTN-1 | CNTN1+ CASPR1 | NF140 | NF155 | NF186 | CASPR-2 | DRG neurons IgG | DRG neurons IgM | Schwann cells IgG | Schwann cells IgM | Motor neurons IgG | Motor neurons IgM |
|----------------|-------|-------|--------|---------------|-------|-------|-------|---------|-----------------|-----------------|-------------------|-------------------|-------------------|-------------------|
| 1              | 0     | 0     | 0      | 0             | 0     | 0     | 0     | 0       | 0               | 0               | 0                 | 0                 | 0                 | 0                 |
| 2              | 0     | 0     | 0      | 0             | 0     | 0     | 0     | 0       | 0               | 0               | 1                 | 0                 | 0                 | 0                 |
| 3              | 0     | 0     | 0      | 0             | 0     | 0     | 0     | 0       | 2               | 1               | 0                 | 1                 | 0                 | 0                 |
| 4              | 0     | 0     | 0      | 0             | 0     | 0     | 0     | 0       | 1               | 2               | 0                 | 3                 | 0                 | 0                 |
| 5              | 0     | 0     | 0      | 0             | 0     | 0     | 0     | 0       | 0               | 0               | 1                 | 0                 | 0                 | 0                 |
| 6              | 0     | 0     | 0      | 0             | 0     | 0     | 0     | 0       | 0               | 0               | 0                 | 0                 | 0                 | 0                 |
| 7              | 0     | 0     | 0      | 0             | 0     | 0     | 0     | 0       | 0               | 0               | 0                 | 3                 | 0                 | 0                 |
| 8              | 0     | 0     | 0      | 0             | 0     | 0     | 0     | 0       | 1               | 0               | 0                 | 1                 | 0                 | 0                 |
| 9              | 0     | 0     | 0      | 0             | 0     | 0     | 0     | 0       | 0               | 0               | 0                 | 1                 | 0                 | 0                 |
| 10             | 0     | 0     | 0      | 0             | 0     | 0     | 0     | 0       | 1               | 0               | 0                 | 1                 | 0                 | 0                 |
| 11             | 0     | 0     | 0      | 0             | 0     | 0     | 0     | 0       | 1               | 0               | 0                 | 0                 | 0                 | 0                 |
| 12             | 0     | 0     | 0      | 0             | 0     | 0     | 0     | 0       | 0               | 0               | 0                 | 0                 | 0                 | 0                 |
| 13             | 0     | 0     | 0      | 0             | 0     | 0     | 0     | 0       | 0               | 0               | 0                 | 0                 | 0                 | 0                 |
| 14             | 0     | 0     | 0      | 0             | 0     | 0     | 0     | 0       | 0               | 0               | 0                 | 0                 | 0                 | 0                 |
| 15             | 0     | 0     | 0      | 0             | 0     | 0     | 0     | 0       | 0               | 0               | 0                 | 0                 | 0                 | 0                 |
| 16             | 0     | 0     | 0      | 0             | 0     | 0     | 0     | 0       | 0               | 0               | 1                 | 0                 | 0                 | 0                 |
| 17             | 0     | 0     | 0      | 0             | 0     | 0     | 0     | 0       | 0               | 0               | 0                 | 0                 | 0                 | 0                 |
| 18             | 0     | 0     | 0      | 0             | 0     | 0     | 0     | 0       | 1               | 0               | 0                 | 0                 | 0                 | 0                 |
| 19             | 0     | 0     | 0      | 0             | 0     | 0     | 0     | 0       | 2               | 0               | 1                 | 0                 | 0                 | 0                 |
| 20             | 0     | 0     | 0      | 0             | 0     | 0     | 0     | 0       | 1               | 0               | 0                 | 1                 | 0                 | 0                 |
| 21             | 0     | 0     | 0      | 0             | 0     | 0     | 0     | 0       | 0               | 0               | 1                 | 2                 | 0                 | 0                 |
| 22             | 0     | 0     | 0      | 0             | 0     | 0     | 0     | 0       | 0               | 0               | 1                 | 0                 | 0                 | 0                 |
| 23             | 0     | 0     | 0      | 0             | 0     | 0     | 0     | 0       | 1               | 0               | 0                 | 0                 | 0                 | 0                 |
| 24             | 0     | 0     | 0      | 0             | 0     | 0     | 0     | 0       | 0               | 0               | 0                 | 0                 | 0                 | 0                 |
| 25             | 0     | 0     | 0      | 0             | 0     | 0     | 0     | 0       | 1               | 0               | 0                 | 0                 | 0                 | 0                 |
| 26             | 0     | 0     | 0      | 0             | 0     | 0     | 0     | 0       | 0               | 0               | 1                 | 0                 | 0                 | 0                 |
| 27             | 0     | 0     | 0      | 0             | 0     | 0     | 0     | 0       | 0               | 0               | 0                 | 0                 | 0                 | 0                 |
| 28             | 0     | 0     | 0      | 0             | 0     | 0     | 0     | 0       | 0               | 0               | 0                 | 1                 | 0                 | 0                 |
| 29             | 0     | 0     | 0      | 0             | 0     | 0     | 0     | 0       | 0               | 0               | 0                 | 0                 | 0                 | 1                 |
| 30             | 0     | 0     | 0      | 0             | 0     | 0     | 0     | 0       | 2               | 0               | 0                 | 0                 | 0                 | 0                 |
| 31             | 0     | 0     | 0      | 0             | 0     | 0     | 0     | 0       | 0               | 1               | 1                 | 0                 | 1                 | 2                 |
| 32             | 0     | 0     | 0      | 0             | 0     | 0     | 0     | 0       | 0               | 1               | 0                 | 1                 | 0                 | 0                 |
| 33             | 0     | 0     | 0      | 0             | 0     | 0     | 0     | 0       | 0               | 0               | 0                 | 2                 | 0                 | 0                 |
| 34             | 0     | 0     | 0      | 0             | 0     | 0     | 0     | 3       | 3               | 1               | 0                 | 2                 | 2                 | 0                 |

Supplementary Table 3. All ICC results.
