# Supplementary material for: Antibodies against cell adhesion molecules and neural structures in paraneoplastic neuropathies
Source: PubMed Central journal article supplement — Ann Clin Transl Neurol. 2018 Mar 26;5(5):559–69. doi: 10.1002/acn3.554 (PMC5945957; doi:10.1002/acn3.554), 2018-03-26
Supplement: ACN3-5-559-s004.pdf [file ACN3-5-559-s004.pdf]

|                                  |                       | Patients     | Controls     | P value       |
|----------------------------------|-----------------------|--------------|--------------|---------------|
| All patients                     | DRG neurons IgG ICC   | 4/34 (11.8%) | 3/28 (10.7%) | 1             |
|                                  | DRG neurons IgM ICC   | 1/34 (2.9%)  | 2/28 (7.1%)  | 0.5847        |
|                                  | Schwann cells IgG ICC | 0/34 (0%)    | 0/28 (0%)    | NA            |
|                                  | Schwann cells IgM ICC | 5/34 (14.7%) | 0/28 (0%)    | 0.0582        |
| Patients with sensory neuropathy | DRG neurons IgG ICC   | 2/24 (8.3%)  | 3/28 (10.7%) | 1             |
|                                  | DRG neurons IgM ICC   | 0/24 (0%)    | 2/28 (7.1%)  | 0.4932        |
|                                  | Schwann cells IgG ICC | 0/24 (0%)    | 0/28 (0%)    | NA            |
|                                  | Schwann cells IgM ICC | 1/24 (4.2%)  | 0/28 (0%)    | 0.4615        |
| Patients with S-M neuropathy     | DRG neurons IgG ICC   | 2/10 (20.0%) | 3/28 (10.7%) | 0.5921        |
|                                  | DRG neurons IgM ICC   | 1/10 (10.0%) | 2/28 (7.1%)  | 1             |
|                                  | Schwann cells IgG ICC | 0/10 (0%)    | 0/28 (0%)    | NA            |
|                                  | Schwann cells IgM ICC | 4/10 (40.0%) | 0/28 (0%)    | <b>0.0028</b> |

**Supplementary Table 4. Statistical analysis of DRG neurons and Schwann cells ICC in PN patients and healthy controls.** Moderate to strong fluorescence intensity scores, including scores two and three, and other stainings, featuring scores zero and one, from DRG neurons and Schwann cells IgG and IgM ICC experiments from patients and controls were analyzed using contingency analysis with the application of a two-tailed Fisher's exact test, accepting an alpha-level <0.05 to determine significance.
