# Supplementary material for: Antibodies against cell adhesion molecules and neural structures in paraneoplastic neuropathies
Source: PubMed Central journal article supplement — Ann Clin Transl Neurol. 2018 Mar 26;5(5):559–69. doi: 10.1002/acn3.554 (PMC5945957; doi:10.1002/acn3.554), 2018-03-26
Supplement: ACN3-5-559-s005.pdf [file ACN3-5-559-s005.pdf]

|                       | Sensory     | Sensory-Motor | P value       |
|-----------------------|-------------|---------------|---------------|
| DRG neurons IgG ICC   | 2/24 (8.3%) | 2/10 (20.0%)  | 0.5636        |
| DRG neurons IgM ICC   | 0/24 (0%)   | 1/10 (10.0%)  | 0.2941        |
| Schwann cells IgG ICC | 0/24 (0%)   | 0/10 (0%)     | NA            |
| Schwann cells IgM ICC | 1/24 (4.2%) | 4/10 (40.0%)  | <b>0.0190</b> |
| Motor neurons IgG ICC | 0/24 (0%)   | 1/10 (10.0%)  | 0.2941        |
| Motor neurons IgM ICC | 1/24 (4.2%) | 0/10 (0%)     | 1             |

**Supplementary Table 5. Statistical analysis of DRG neurons, Schwann cells and motor neurons ICC in PN patients with sensory neuronopathy or sensory-motor neuropathy.** Moderate to strong fluorescence intensity scores, including scores two and three, and other stainings, featuring scores zero and one, from DRG neurons, motor neurons and Schwann cells IgG and IgM ICC experiments were analyzed using contingency analysis with the application of a two-tailed Fisher's exact test, accepting an alpha-level <0.05 to determine significance.
