# Supplementary material for: Antibodies against cell adhesion molecules and neural structures in paraneoplastic neuropathies
Source: PubMed Central journal article supplement — Ann Clin Transl Neurol. 2018 Mar 26;5(5):559–69. doi: 10.1002/acn3.554 (PMC5945957; doi:10.1002/acn3.554), 2018-03-26
Supplement: ACN3-5-559-s007.pdf [file ACN3-5-559-s007.pdf]

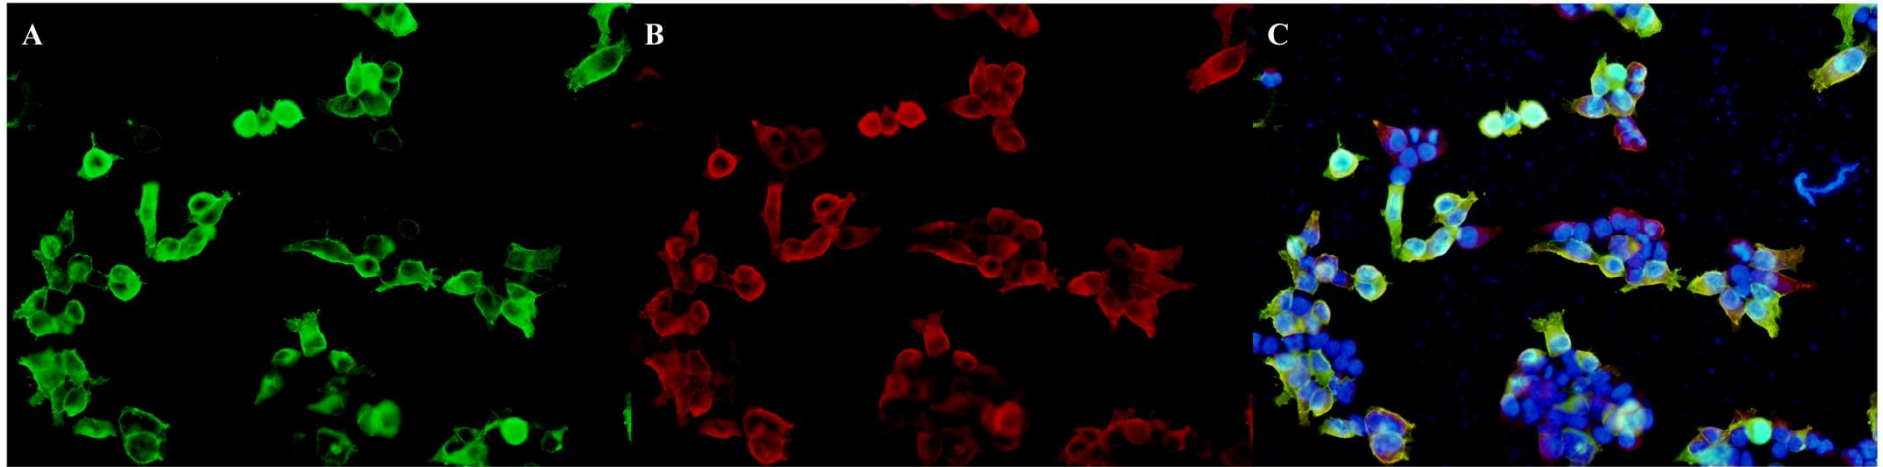

**Supplementary Figure 2. Positive CASPR2 ICC.** HEK293 cells were transfected with a mammalian expression vector encoding CASPR2 with the use of Lipofectamine 2000 (Invitrogen, 11668019) and ICC was performed as described in Supplementary Table 5. Commercial antibody staining can be appreciated in green (A), patient's 34 sera positivity in red (B), and a merged picture of both can be found above with nuclei stained in blue (C).
