# Supplementary figures and images for: Antibodies against cell adhesion molecules and neural structures in paraneoplastic neuropathies
Source: PubMed Central journal article supplement — Ann Clin Transl Neurol. 2018 Mar 26;5(5):559–69. doi: 10.1002/acn3.554 (PMC5945957; doi:10.1002/acn3.554), 2018-03-26

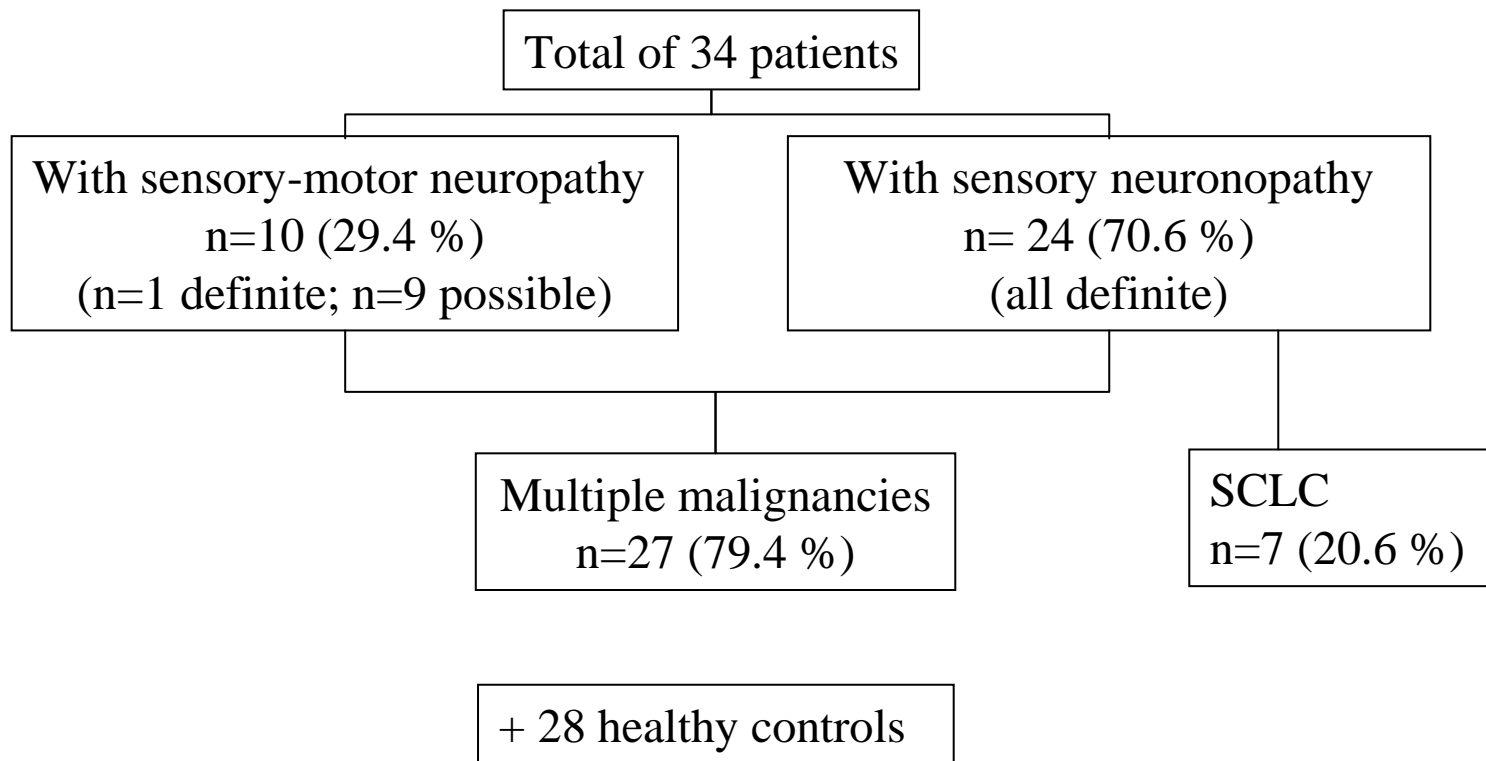

**Supplementary Figure 1. Study cohorts**

Supplement: ACN3-5-559-s006.pdf [file ACN3-5-559-s006.pdf]
